# Supplementary figures and images for: Welche Rolle spielen endogene Opiate bei der barorezeptorenabhängigen Schmerzmodulation? Eine Untersuchung normotoner Versuchspersonen
Source: Oxford University Press journal article supplement (doi:10.2337/db08-0356), 2002-01-01

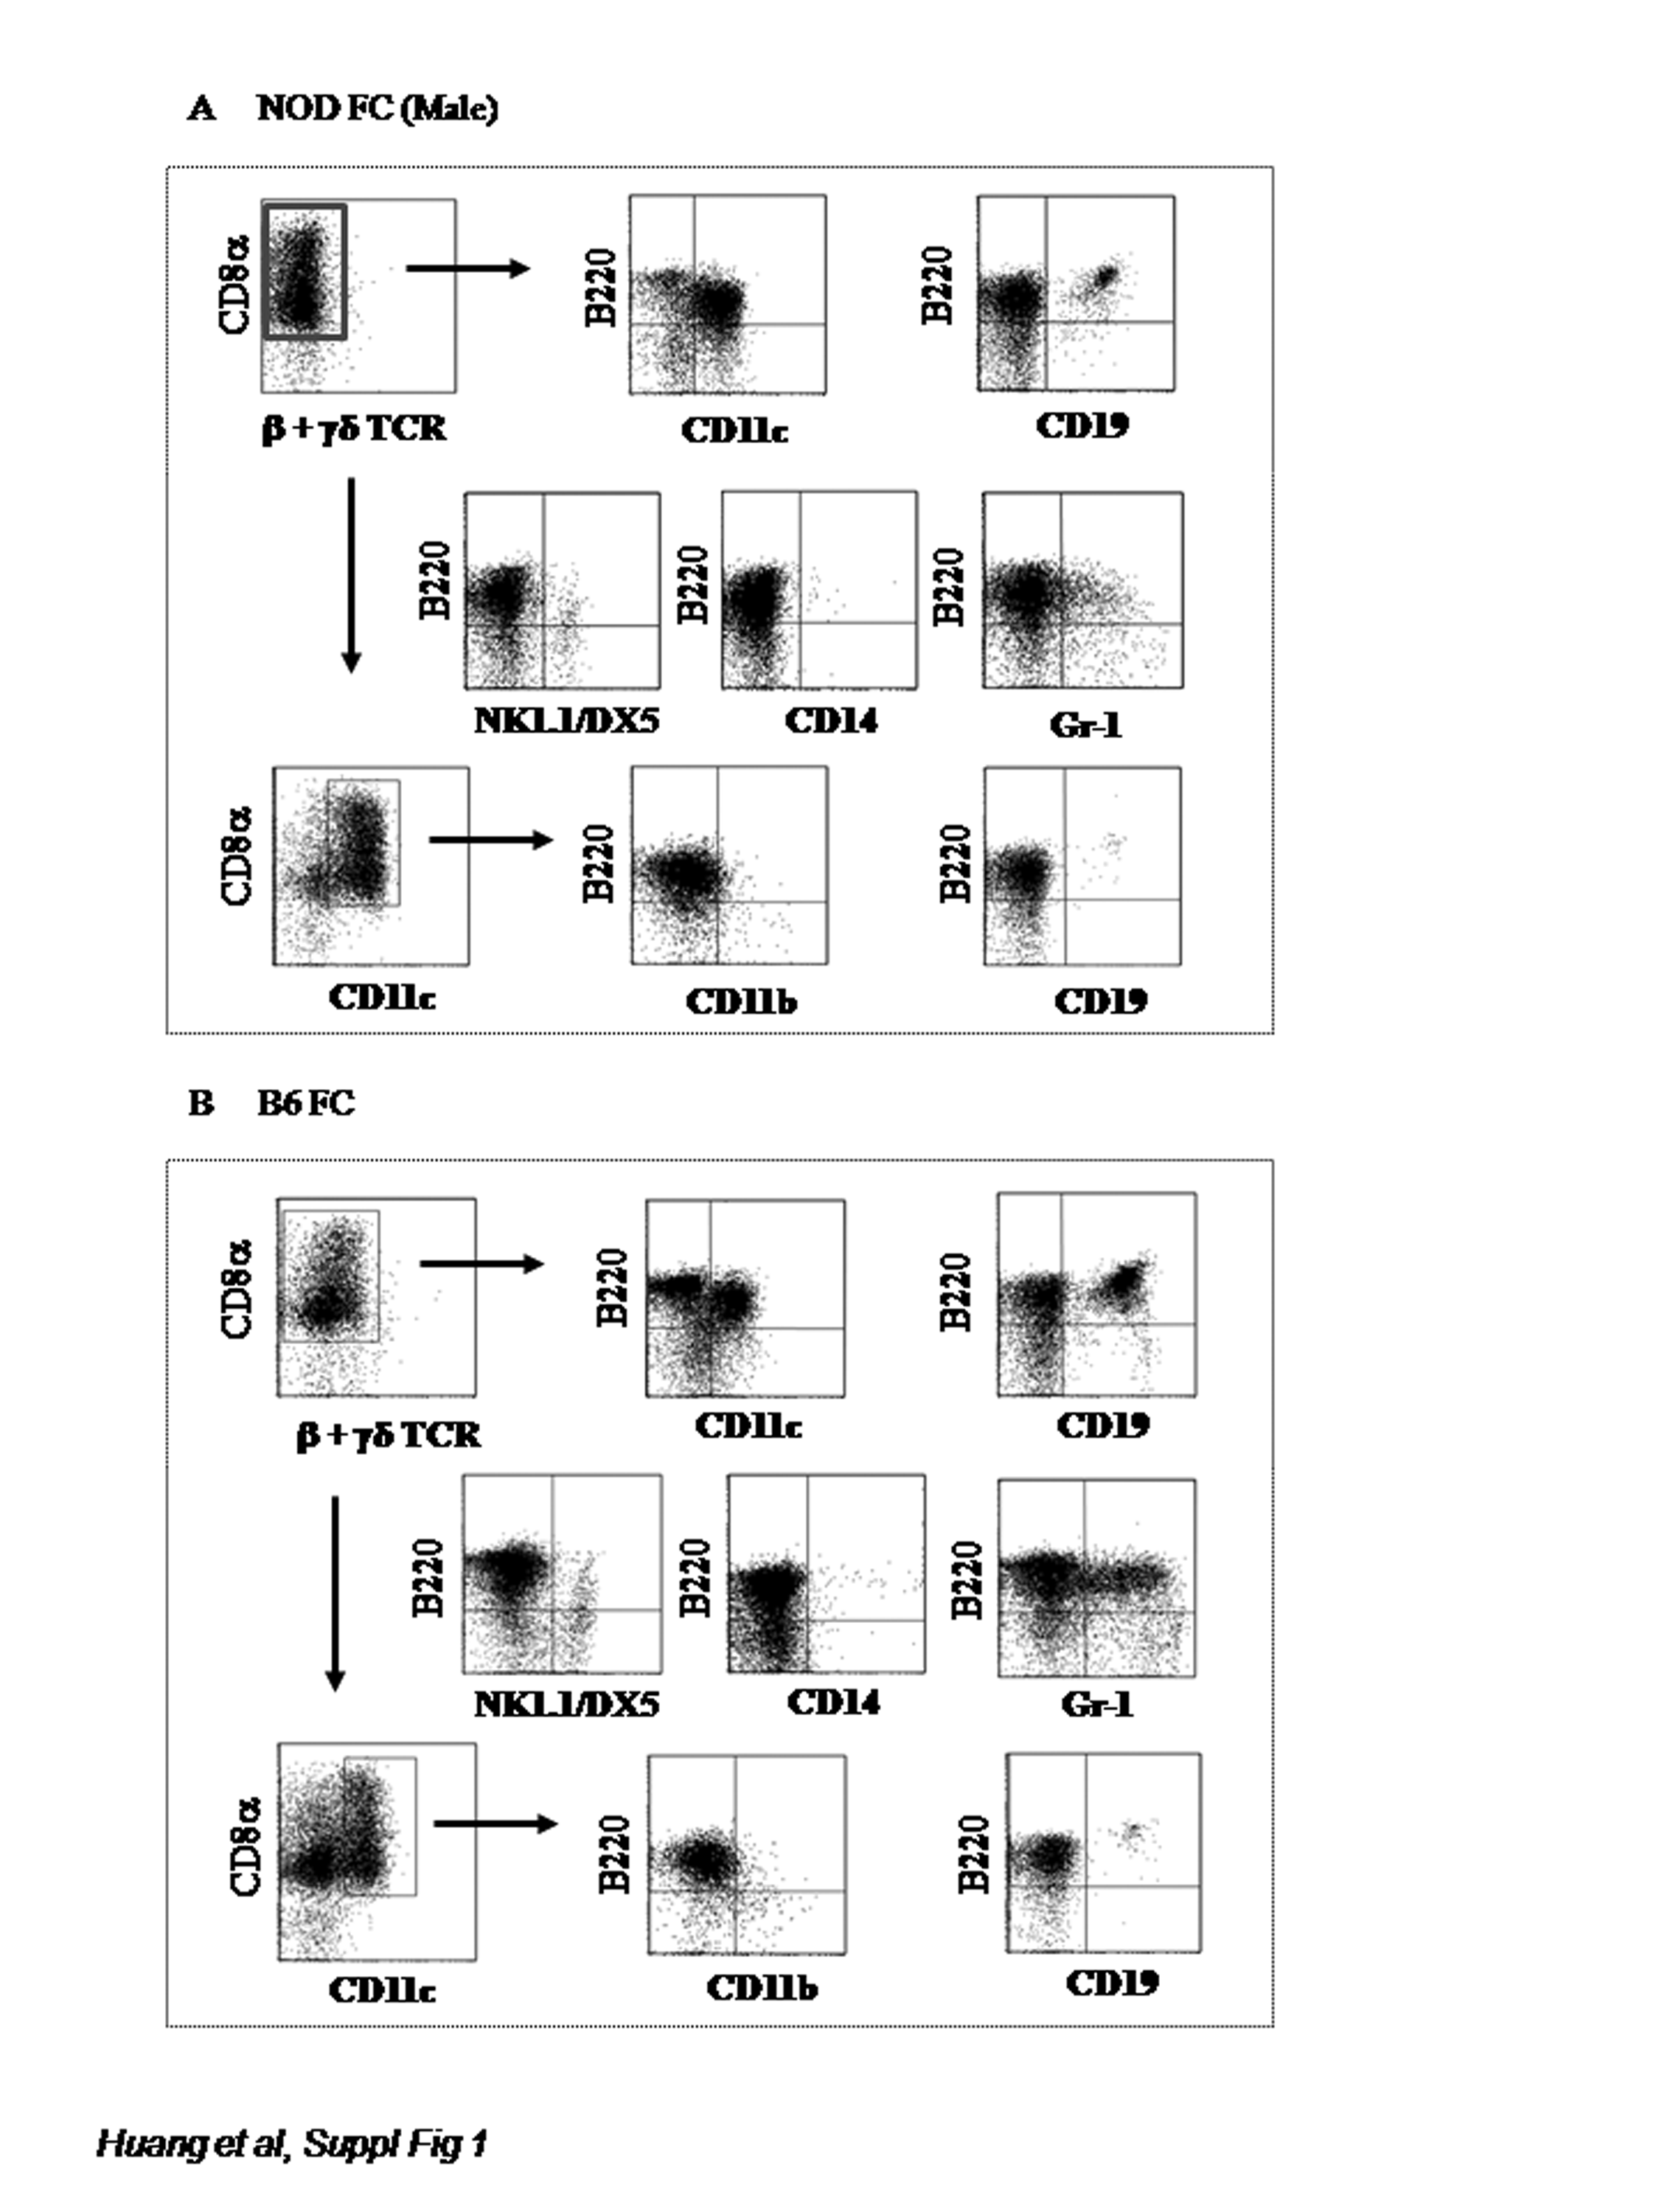


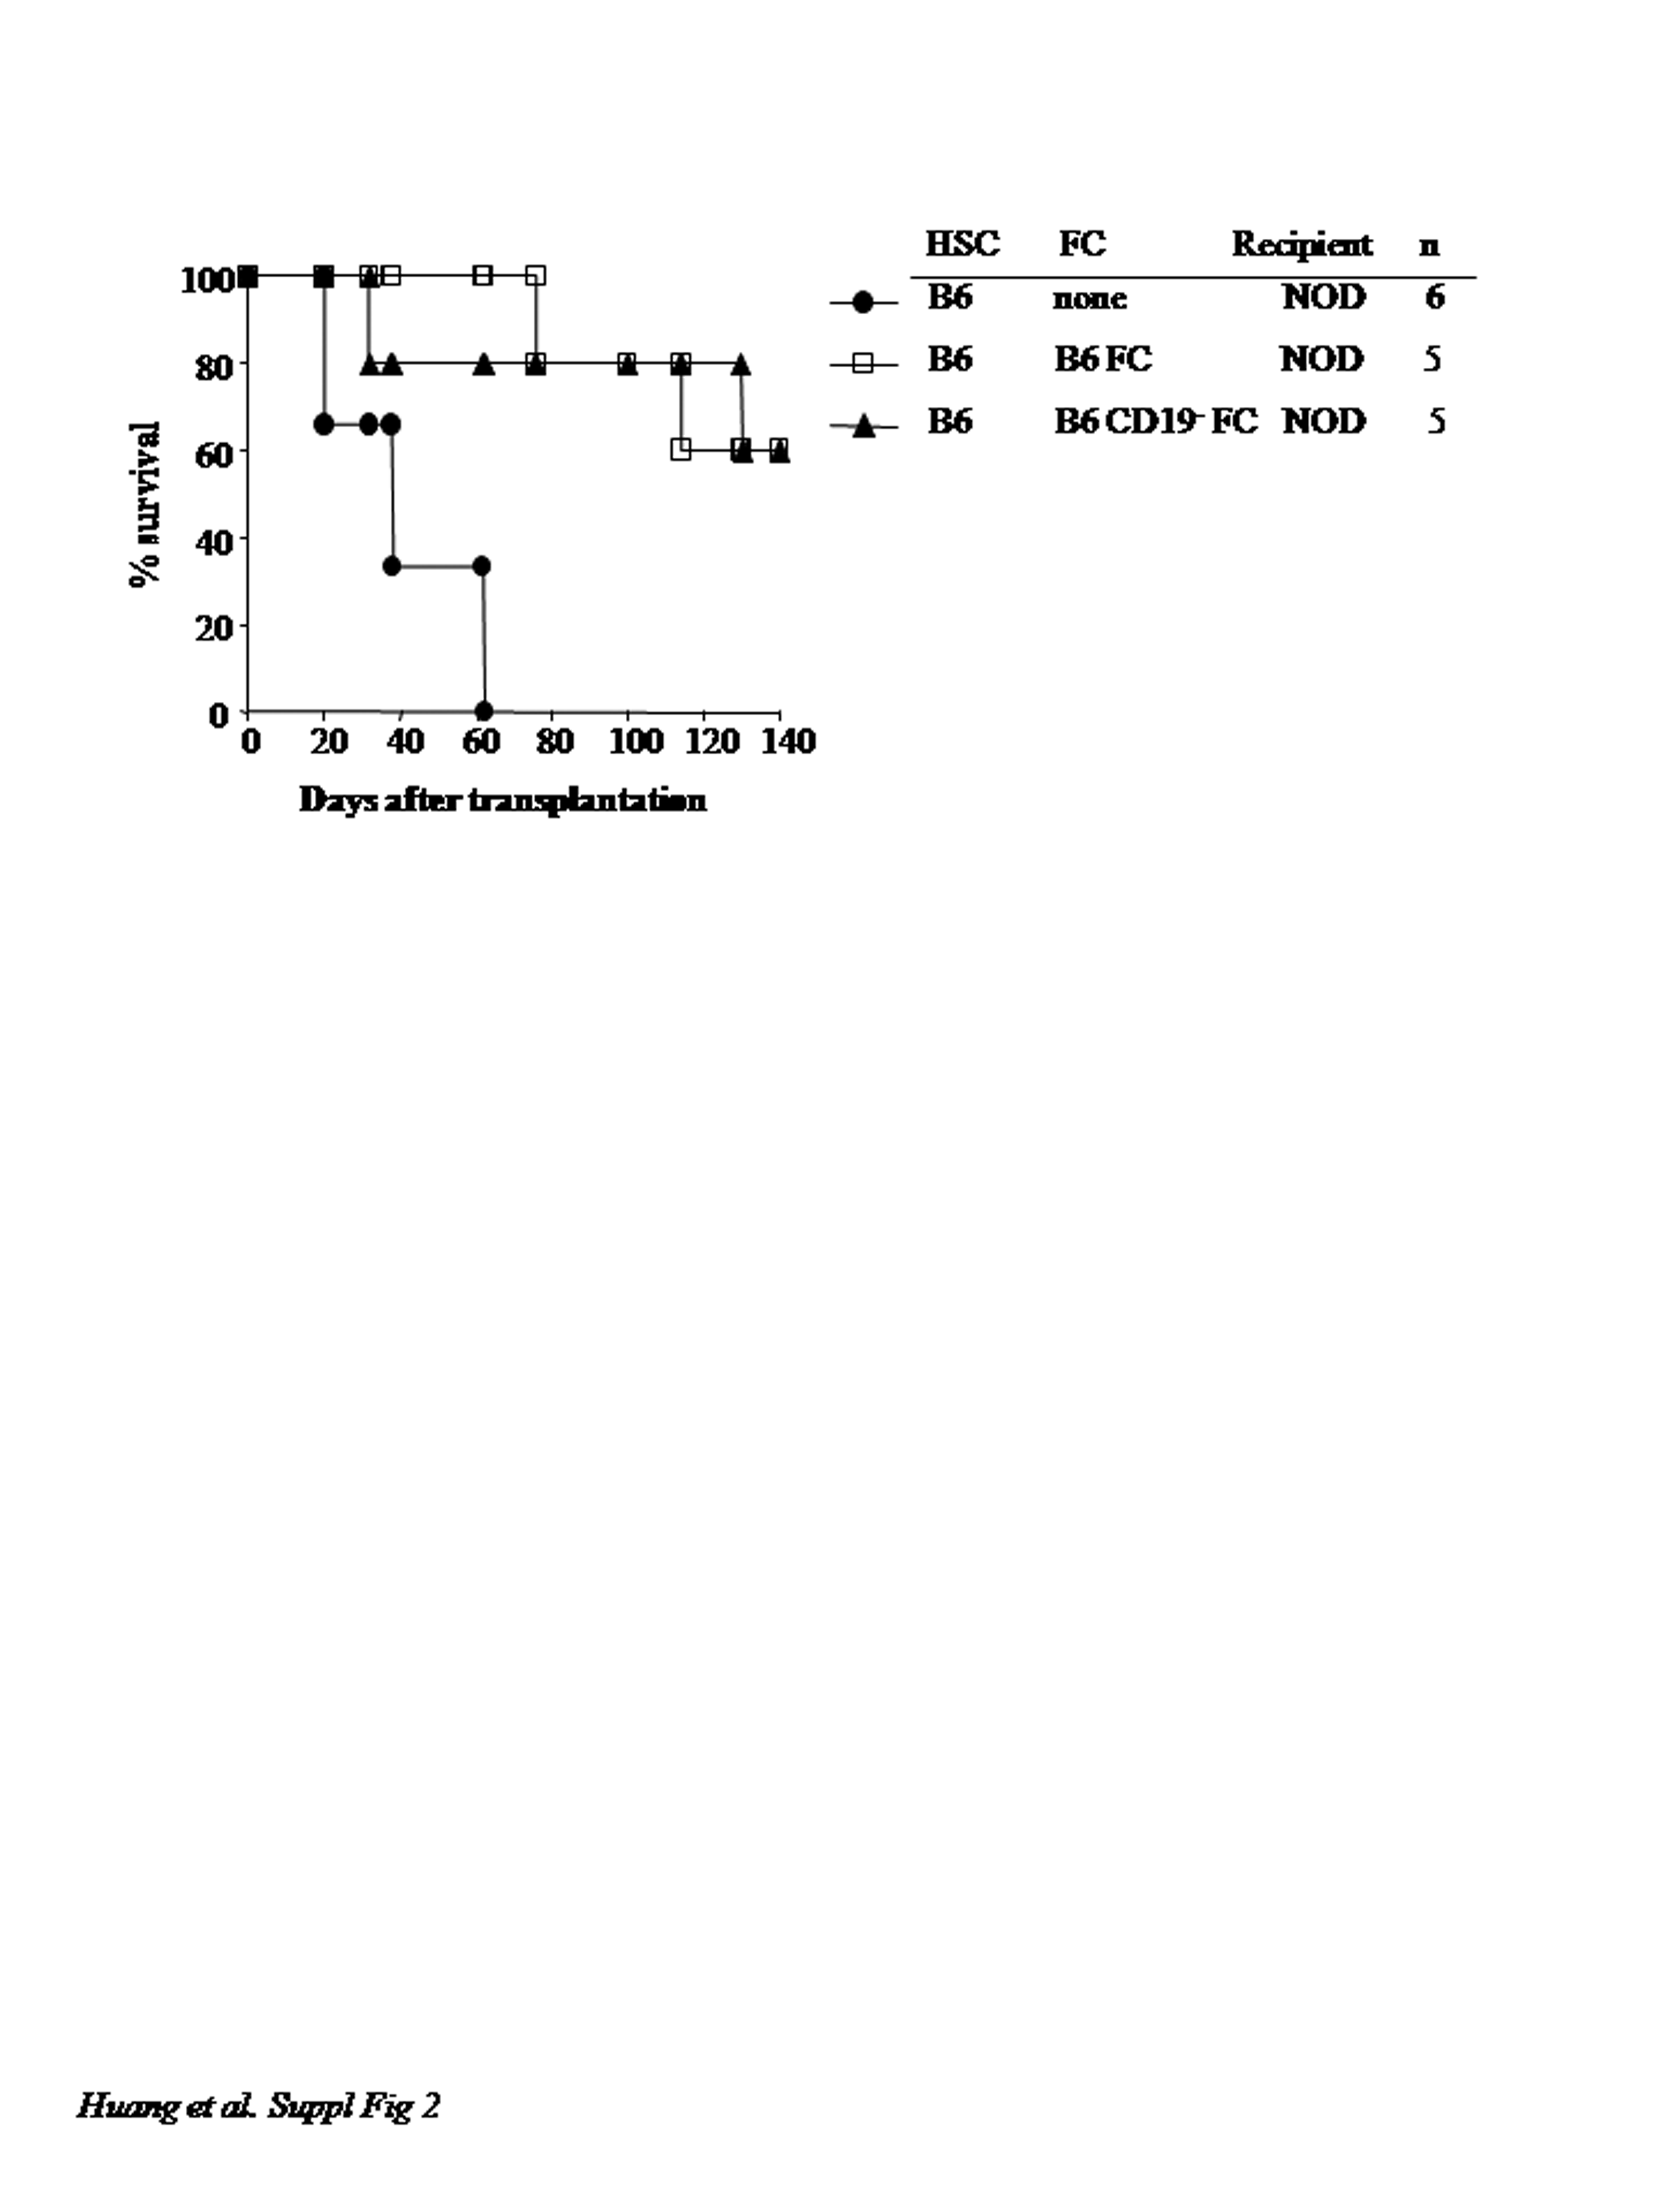

Supplement: db080356-sup-supp.doc [file db080356-sup-supp.doc]
